# Supplementary material
Source: publisher figshare collection journal article supplement (https://frontiersin.figshare.com/ndownloader/files/26570657)
Supplement: Supplementary file 1 [file 26570657]

T1	T2	T3	T4	T5	T6
0	0	0	0	0	1
0	0	0	0	0	1
0	0	0	0	0	1
0	0	0	0	0	1
0	0	0	0	0	1
0	0	0	0	0	1
0	0	0	0	0	1
0	0	0	0	0	1
0	0	0	0	0	1
0	0	0	0	0	1
0	0	0	0	0	1
0	0	0	0	0	1
0	0	0	0	0	1
0	0	0	0	0	1
0	0	0	0	0	1
0	0	0	0	0	1
0	0	0	0	0	1
0	0	0	0	0	1
0	0	0	0	0	1
0	0	0	0	0	1
0	0	0	0	0	1
0	0	0	0	0	1
0	0	0	0	0	1
0	0	0	0	0	1
0	0	0	0	0	1
0	0	0	0	0	1
0	0	0	0	0	1
0	0	0	0	0	1
0	0	0	0	0	1
0	0	0	0	0	1
0	0	0	0	0	1
0	0	0	0	0	1
0	0	0	0	0	1
0	0	0	0	0	1
0	0	0	0	0	1
0	0	0	0	0	1
0	0	0	0	0	1
0	0	0	0	0	1
0	0	0	0	0	1
0	0	0	0	0	1
0	0	0	0	0	1
0	0	0	0	0	1
0	0	0	0	0	1
0	0	0	0	0	1
0	0	0	0	0	1
0	0	0	0	0	1
0	0	0	0	0	1
0	0	0	0	0	1
0	0	0	0	0	1
0	0	0	0	0	1
0	0	0	0	0	1
0	0	0	0	0	1
0	0	0	0	0	1
0	0	0	0	0	1
0	0	0	0	0	1
0	0	0	0	0	1
0	0	0	0	0	1
0	0	0	0	0	1
0	0	0	0	0	1
0	0	0	0	0	1
0	0	0	0	0	1
0	0	0	0	0	1
0	0	0	0	0	1
0	0	0	0	0	1
0	0	0	0	0	1
0	0	0	0	0	1
0	0	0	0	0	1
0	0	0	0	0	1
0	0	0	0	0	1
0	0	0	0	0	1
0	0	0	0	0	1
0	0	0	0	0	1
0	0	0	0	0	1
0	0	0	0	0	1
0	0	0	0	0	1
0	0	0	0	0	1
0	0	0	0	0	1
0	0	0	0	0	1
0	0	0	0	0	1
0	0	0	0	0	1
0	0	0	0	0	1
0	0	0	0	0	1
0	0	0	0	0	1
0	0	0	0	0	1
0	0	0	0	0	1
0	0	0	0	0	1
0	0	0	0	0	1
0	0	0	0	0	1
0	0	0	0	0	1
0	0	0	0	0	1
0	0	0	0	0	1
0	0	0	0	0	1
0	0	0	0	0	1
0	0	0	0	0	1
0	0	0	0	0	1
0	0	0	0	0	1
0	0	0	0	0	1
0	0	0	0	0	1
0	0	0	0	0	1
0	0	0	0	0	1
0	0	0	0	0	1
0	0	0	0	0	1
0	0	0	0	0	1
0	0	0	0	0	1
0	0	0	0	0	1
0	0	0	0	0	1
0	0	0	0	0	1
0	0	0	0	0	1
0	0	0	0	0	1
0	0	0	0	0	1
0	0	0	0	0	1
0	0	0	0	0	1
0	0	0	0	0	1
0	0	0	0	0	1
0	0	0	0	0	1
0	0	0	0	0	1
0	0	0	0	0	1
0	0	0	0	0	1
0	0	0	0	0	1
0	0	0	0	0	1
0	0	0	0	0	1
0	0	0	0	0	1
0	0	0	0	0	1
0	0	0	0	0	1
0	0	0	0	0	1
0	0	0	0	0	1
0	0	0	0	0	1
0	0	0	0	0	1
0	0	0	0	0	1
0	0	0	0	0	1
0	0	0	0	0	1
0	0	0	0	0	1
0	0	0	0	0	1
0	0	0	0	0	1
0	0	0	0	0	1
0	0	0	0	0	1
0	0	0	0	0	1
0	0	0	0	0	1
0	0	0	0	0	1
0	0	0	0	0	1
0	0	0	0	0	1
0	0	0	0	0	1
0	0	0	0	0	1
0	0	0	0	0	1
0	0	0	0	0	1
0	0	0	0	0	1
0	0	0	0	0	1
0	0	0	0	0	1
0	0	0	0	0	1
0	0	0	0	0	1
0	0	0	0	0	1
0	0	0	0	0	1
0	0	0	0	0	1
0	0	0	0	0	1
0	0	0	0	0	1
0	0	0	0	0	1
0	0	0	0	0	1
0	0	0	0	0	1
0	0	0	0	0	2
0	0	0	0	0	2
0	0	0	0	0	2
0	0	0	0	0	2
0	0	0	0	0	2
0	0	0	0	0	2
0	0	0	0	0	2
0	0	0	0	0	2
0	0	0	0	0	2
0	0	0	0	0	2
0	0	0	0	0	2
0	0	0	0	0	2
0	0	0	0	0	2
0	0	0	0	0	2
0	0	0	0	0	2
0	0	0	0	0	2
0	0	0	0	0	2
0	0	0	0	0	2
0	0	0	0	0	2
0	0	0	0	0	2
0	0	0	0	0	2
0	0	0	0	0	2
0	0	0	0	0	2
0	0	0	0	0	2
0	0	0	0	0	2
0	0	0	0	0	2
0	0	0	0	0	2
0	0	0	0	0	2
0	0	0	0	0	2
0	0	0	0	0	2
0	0	0	0	0	2
0	0	0	0	0	2
0	0	0	0	0	2
0	0	0	0	0	2
0	0	0	0	0	2
0	0	0	0	0	2
0	0	0	0	0	2
0	0	0	0	0	2
0	0	0	0	0	2
0	0	0	0	0	2
0	0	0	0	0	2
0	0	0	0	0	2
0	0	0	0	0	2
0	0	0	0	0	2
0	0	0	0	0	2
0	0	0	0	0	2
0	0	0	0	0	2
0	0	0	0	0	2
0	0	0	0	0	2
0	0	0	0	0	2
0	0	0	0	0	2
0	0	0	0	0	2
0	0	0	0	0	2
0	0	0	0	0	2
0	0	0	0	0	2
0	0	0	0	0	2
0	0	0	0	0	2
0	0	0	0	0	2
0	0	0	0	0	2
0	0	0	0	0	2
0	0	0	0	0	2
0	0	0	0	0	2
0	0	0	0	0	2
0	0	0	0	0	2
0	0	0	0	0	2
0	0	0	0	0	2
0	0	0	0	0	2
0	0	0	0	0	2
0	0	0	0	0	2
0	0	0	0	0	2
0	0	0	0	0	2
0	0	0	0	0	2
0	0	0	0	0	2
0	0	0	0	0	2
0	0	0	0	0	2
0	0	0	0	0	2
0	0	0	0	0	2
0	0	0	0	0	2
0	0	0	0	0	2
0	0	0	0	0	2
0	0	0	0	0	2
0	0	0	0	0	2
0	0	0	0	0	2
0	0	0	0	0	2
0	0	0	0	0	2
0	0	0	0	0	2
0	0	0	0	0	2
0	0	0	0	0	2
0	0	0	0	0	2
0	0	0	0	0	2
0	0	0	0	0	2
0	0	0	0	0	2
0	0	0	0	0	2
0	0	0	0	0	2
0	0	0	0	0	2
0	0	0	0	0	2
0	0	0	0	0	2
0	0	0	0	0	2
0	0	0	0	0	2
0	0	0	0	0	2
0	0	0	0	0	2
0	0	0	0	0	2
0	0	0	0	0	2
0	0	0	0	0	2
0	0	0	0	0	2
0	0	0	0	0	2
0	0	0	0	0	2
0	0	0	0	0	2
0	0	0	0	0	2
0	0	0	0	0	2
0	0	0	0	0	2
0	0	0	0	0	2
0	0	0	0	0	2
0	0	0	0	0	2
0	0	0	0	0	2
0	0	0	0	0	2
0	0	0	0	0	2
0	0	0	0	0	2
0	0	0	0	0	2
0	0	0	0	0	2
0	0	0	0	0	2
0	0	0	0	0	2
0	0	0	0	0	2
0	0	0	0	0	2
0	0	0	0	0	2
0	0	0	0	0	2
0	0	0	0	0	2
0	0	0	0	0	2
0	0	0	0	0	2
0	0	0	0	0	2
0	0	0	0	0	2
0	0	0	0	0	2
0	0	0	0	0	2
0	0	0	0	0	2
0	0	0	0	0	2
0	0	0	0	0	2
0	0	0	0	0	2
0	0	0	0	0	2
0	0	0	0	0	2
0	0	0	0	0	2
0	0	0	0	0	2
0	0	0	0	0	2
0	0	0	0	0	2
0	0	0	0	0	2
0	0	0	0	0	2
0	0	0	0	0	2
0	0	0	0	0	2
0	0	0	0	0	2
0	0	0	0	0	2
0	0	0	0	0	2
0	0	0	0	0	2
0	0	0	0	0	2
0	0	0	0	0	2
0	0	0	0	0	2
0	0	0	0	0	2
0	0	0	0	0	2
0	0	0	0	0	2
0	0	0	0	0	2
0	0	0	0	0	2
0	0	0	0	0	2
0	0	0	0	0	2
0	0	0	0	0	2
0	0	0	0	0	2
0	0	0	0	0	2
0	0	0	0	0	2
0	0	0	0	0	2
0	0	0	0	0	2
0	0	0	0	0	2
0	0	0	0	0	2
0	0	0	0	0	2
0	0	0	0	0	2
0	0	0	0	0	2
0	0	0	0	0	2
0	0	0	0	0	2
0	0	0	0	0	2
0	0	0	0	0	2
0	0	0	0	0	2
0	0	0	0	0	2
0	0	0	0	0	2
0	0	0	0	0	2
0	0	0	0	0	2
0	0	0	0	0	2
0	0	0	0	0	2
0	0	0	0	0	2
0	0	0	0	0	2
0	0	0	0	0	2
0	0	0	0	0	2
0	0	0	0	0	2
0	0	0	0	0	2
0	0	0	0	0	2
0	0	0	0	0	2
0	0	0	0	0	2
0	0	0	0	0	2
0	0	0	0	0	2
0	0	0	0	0	2
0	0	0	0	0	2
0	0	0	0	0	2
0	0	0	0	0	2
0	0	0	0	0	2
0	0	0	0	0	2
0	0	0	0	0	2
0	0	0	0	0	2
0	0	0	0	0	2
0	0	0	0	0	2
0	0	0	0	0	2
0	0	0	0	0	2
0	0	0	0	0	2
0	0	0	0	0	2
0	0	0	0	0	2
0	0	0	0	0	2
0	0	0	0	0	2
0	0	0	0	0	2
0	0	0	0	0	2
0	0	0	0	0	2
0	0	0	0	0	2
0	0	0	0	0	2
0	0	0	0	0	2
0	0	0	0	0	2
0	0	0	0	0	2
0	0	0	0	0	2
0	0	0	0	0	2
0	0	0	0	0	2
0	0	0	0	0	2
0	0	0	0	0	2
0	0	0	0	0	2
0	0	0	0	0	2
0	0	0	0	0	2
0	0	0	0	0	2
0	0	0	0	0	2
0	0	0	0	0	2
0	0	0	0	0	2
0	0	0	0	0	2
0	0	0	0	0	2
0	0	0	0	0	2
0	0	0	0	0	2
0	0	0	0	0	2
0	0	0	0	0	2
0	0	0	0	0	2
0	0	0	0	0	2
0	0	0	0	0	2
0	0	0	0	0	2
0	0	0	0	0	2
0	0	0	0	0	2
0	0	0	0	0	2
0	0	0	0	0	2
0	0	0	0	0	2
0	0	0	0	0	2
0	0	0	0	0	2
0	0	0	0	0	2
0	0	0	0	0	2
0	0	0	0	0	2
0	0	0	0	0	2
0	0	0	0	0	2
0	0	0	0	0	2
0	0	0	0	0	2
0	0	0	0	0	2
0	0	0	0	0	2
0	0	0	0	0	2
0	0	0	0	0	2
0	0	0	0	0	2
0	0	0	0	0	2
0	0	0	0	0	2
0	0	0	0	0	2
0	0	0	0	0	2
0	0	0	0	0	2
0	0	0	0	0	2
0	0	0	0	0	2
0	0	0	0	0	2
0	0	0	0	0	2
0	0	0	0	0	2
0	0	0	0	0	2
0	0	0	0	0	2
0	0	0	0	0	2
0	0	0	0	0	2
0	0	0	0	0	2
0	0	0	0	0	2
0	0	0	0	0	2
0	0	0	0	0	2
0	0	0	0	0	2
0	0	0	0	0	2
0	0	0	0	0	2
0	0	0	0	0	2
0	0	0	0	0	2
0	0	0	0	0	2
0	0	0	0	0	2
0	0	0	0	0	2
0	0	0	0	0	2
0	0	0	0	0	2
0	0	0	0	0	2
0	0	0	0	0	2
0	0	0	0	0	2
0	0	0	0	0	2
0	0	0	0	0	2
0	0	0	0	0	2
0	0	0	0	0	2
0	0	0	0	0	2
0	0	0	0	0	2
0	0	0	0	0	2
0	0	0	0	0	2
0	0	0	0	0	2
0	0	0	0	0	2
0	0	0	0	0	2
0	0	0	0	0	2
0	0	0	0	0	2
0	0	0	0	0	2
0	0	0	0	0	2
0	0	0	0	0	2
0	0	0	0	0	2
0	0	0	0	0	2
0	0	0	0	0	2
0	0	0	0	0	2
0	0	0	0	0	2
0	0	0	0	0	2
0	0	0	0	0	2
0	0	0	0	0	2
0	0	0	0	0	2
0	0	0	0	0	2
0	0	0	0	0	2
0	0	0	0	0	2
0	0	0	0	0	2
0	0	0	0	0	2
0	0	0	0	0	2
0	0	0	0	0	2
0	0	0	0	0	2
0	0	0	0	0	2
0	0	0	0	0	2
0	0	0	0	0	2
0	0	0	0	0	2
0	0	0	0	0	2
0	0	0	0	0	2
0	0	0	0	0	2
0	0	0	0	0	2
0	0	0	0	0	2
0	0	0	0	0	2
0	0	0	0	0	2
0	0	0	0	0	2
0	0	0	0	0	2
0	0	0	0	0	2
0	0	0	0	0	2
0	0	0	0	0	2
0	0	0	0	0	2
0	0	0	0	0	2
0	0	0	0	0	2
0	0	0	0	0	2
0	0	0	0	0	2
0	0	0	0	0	2
0	0	0	0	0	2
0	0	0	0	0	2
0	0	0	0	0	2
0	0	0	0	0	2
0	0	0	0	0	2
0	0	0	0	0	2
0	0	0	0	0	3
0	0	0	0	0	3
0	0	0	0	0	3
0	0	0	0	0	3
0	0	0	0	0	3
0	0	0	0	0	3
0	0	0	0	0	3
0	0	0	0	0	3
0	0	0	0	0	3
0	0	0	0	0	3
0	0	0	0	0	3
0	0	0	0	0	3
0	0	0	0	0	3
0	0	0	0	0	3
0	0	0	0	0	3
0	0	0	0	0	3
0	0	0	0	0	3
0	0	0	0	0	3
0	0	0	0	0	3
0	0	0	0	0	3
0	0	0	0	0	3
0	0	0	0	0	3
0	0	0	0	0	3
0	0	0	0	0	3
0	0	0	0	0	3
0	0	0	0	0	3
0	0	0	0	0	3
0	0	0	0	0	3
0	0	0	0	0	3
0	0	0	0	0	3
0	0	0	0	0	3
0	0	0	0	0	3
0	0	0	0	0	3
0	0	0	0	0	3
0	0	0	0	0	3
0	0	0	0	0	3
0	0	0	0	0	3
0	0	0	0	0	3
0	0	0	0	0	3
0	0	0	0	0	3
0	0	0	0	0	3
0	0	0	0	0	3
0	0	0	0	0	3
0	0	0	0	0	3
0	0	0	0	0	3
0	0	0	0	0	3
0	0	0	0	0	3
0	0	0	0	0	3
0	0	0	0	0	3
0	0	0	0	0	3
0	0	0	0	0	3
0	0	0	0	0	3
0	0	0	0	0	3
0	0	0	0	0	3
0	0	0	0	0	3
0	0	0	0	0	3
0	0	0	0	0	3
0	0	0	0	0	3
0	0	0	0	0	3
0	0	0	0	0	3
0	0	0	0	0	3
0	0	0	0	0	3
0	0	0	0	0	3
0	0	0	0	0	3
0	0	0	0	0	3
0	0	0	0	0	3
0	0	0	0	0	3
0	0	0	0	0	3
0	0	0	0	0	3
0	0	0	0	0	3
0	0	0	0	0	3
0	0	0	0	0	3
0	0	0	0	0	3
0	0	0	0	0	3
0	0	0	0	0	3
0	0	0	0	0	3
0	0	0	0	0	3
0	0	0	0	0	3
0	0	0	0	0	3
0	0	0	0	0	3
0	0	0	0	0	3
0	0	0	0	0	3
0	0	0	0	0	3
0	0	0	0	0	3
0	0	0	0	0	3
0	0	0	0	0	3
0	0	0	0	0	3
0	0	0	0	0	3
0	0	0	0	0	3
0	0	0	0	0	3
0	0	0	0	0	3
0	0	0	0	0	3
0	0	0	0	0	3
0	0	0	0	0	3
0	0	0	0	0	3
0	0	0	0	0	3
0	0	0	0	0	3
0	0	0	0	0	3
0	0	0	0	0	3
0	0	0	0	0	3
0	0	0	0	0	3
0	0	0	0	0	3
0	0	0	0	0	3
0	0	0	0	0	3
0	0	0	0	0	3
0	0	0	0	0	3
0	0	0	0	0	3
0	0	0	0	0	3
0	0	0	0	0	3
0	0	0	0	0	3
0	0	0	0	0	3
0	0	0	0	0	3
0	0	0	0	0	3
0	0	0	0	0	3
0	0	0	0	0	3
0	0	0	0	0	3
0	0	0	0	0	3
0	0	0	0	0	3
0	0	0	0	0	3
0	0	0	0	0	3
0	0	0	0	0	3
0	0	0	0	0	3
0	0	0	0	0	3
0	0	0	0	0	3
0	0	0	0	0	3
0	0	0	0	0	3
0	0	0	0	0	3
0	0	0	0	0	3
0	0	0	0	0	3
0	0	0	0	0	3
0	0	0	0	0	3
0	0	0	0	0	3
0	0	0	0	0	3
0	0	0	0	0	3
0	0	0	0	0	3
0	0	0	0	0	3
0	0	0	0	0	3
0	0	0	0	0	3
0	0	0	0	0	3
0	0	0	0	0	3
0	0	0	0	0	3
0	0	0	0	0	3
0	0	0	0	0	3
0	0	0	0	0	3
0	0	0	0	0	3
0	0	0	0	0	3
0	0	0	0	0	3
0	0	0	0	0	3
0	0	0	0	0	3
0	0	0	0	0	3
0	0	0	0	0	3
0	0	0	0	0	3
0	0	0	0	0	3
0	0	0	0	0	3
0	0	0	0	0	3
0	0	0	0	0	3
0	0	0	0	0	3
0	0	0	0	0	3
0	0	0	0	0	3
0	0	0	0	0	3
0	0	0	0	0	3
0	0	0	0	0	3
0	0	0	0	0	3
0	0	0	0	0	3
0	0	0	0	0	3
0	0	0	0	0	3
0	0	0	0	0	3
0	0	0	0	0	3
0	0	0	0	0	3
0	0	0	0	0	3
0	0	0	0	0	3
0	0	0	0	0	3
0	0	0	0	0	3
0	0	0	0	0	3
0	0	0	0	0	3
0	0	0	0	0	3
0	0	0	0	0	3
0	0	0	0	0	3
0	0	0	0	0	3
0	0	0	0	0	3
0	0	0	0	0	3
0	0	0	0	0	3
0	0	0	0	0	3
0	0	0	0	0	3
0	0	0	0	0	3
0	0	0	0	0	3
0	0	0	0	0	3
0	0	0	0	0	3
0	0	0	0	0	3
0	0	0	0	0	3
0	0	0	0	0	3
0	0	0	0	0	3
0	0	0	0	0	3
0	0	0	0	0	3
0	0	0	0	0	3
0	0	0	0	0	3
0	0	0	0	0	3
0	0	0	0	0	3
0	0	0	0	0	3
0	0	0	0	0	3
0	0	0	0	0	3
0	0	0	0	0	3
0	0	0	0	0	3
0	0	0	0	0	3
0	0	0	0	0	3
0	0	0	0	0	3
0	0	0	0	0	3
0	0	0	0	0	3
0	0	0	0	0	3
0	0	0	0	0	3
0	0	0	0	0	3
0	0	0	0	0	3
0	0	0	0	0	3
0	0	0	0	0	3
0	0	0	0	0	3
0	0	0	0	0	3
0	0	0	0	0	3
0	0	0	0	0	3
0	0	0	0	0	3
0	0	0	0	0	3
0	0	0	0	0	3
0	0	0	0	0	3
0	0	0	0	0	3
0	0	0	0	0	3
0	0	0	0	0	3
0	0	0	0	0	3
0	0	0	0	0	3
0	0	0	0	0	3
0	0	0	0	0	3
0	0	0	0	0	3
0	0	0	0	0	3
0	0	0	0	0	3
0	0	0	0	0	3
0	0	0	0	0	3
0	0	0	0	0	3
0	0	0	0	0	3
0	0	0	0	0	3
0	0	0	0	0	3
0	0	0	0	0	3
0	0	0	0	0	3
0	0	0	0	0	3
0	0	0	0	0	3
0	0	0	0	0	3
0	0	0	0	0	3
0	0	0	0	0	3
0	0	0	0	0	3
0	0	0	0	0	3
0	0	0	0	0	3
0	0	0	0	0	3
0	0	0	0	0	3
0	0	0	0	0	3
0	0	0	0	0	3
0	0	0	0	0	3
0	0	0	0	0	3
0	0	0	0	0	3
0	0	0	0	0	3
0	0	0	0	0	3
0	0	0	0	0	3
0	0	0	0	0	3
0	0	0	0	0	3
0	0	0	0	0	3
0	0	0	0	0	3
0	0	0	0	0	3
0	0	0	0	0	3
0	0	0	0	0	3
0	0	0	0	0	3
0	0	0	0	0	3
0	0	0	0	0	3
0	0	0	0	0	3
0	0	0	0	0	3
0	0	0	0	0	3
0	0	0	0	1	0
0	0	0	0	1	0
0	0	0	0	1	0
0	0	0	0	1	0
0	0	0	0	1	0
0	0	0	0	1	0
0	0	0	0	1	0
0	0	0	0	1	0
0	0	0	0	1	0
0	0	0	0	1	0
0	0	0	0	1	0
0	0	0	0	1	0
0	0	0	0	1	0
0	0	0	0	1	0
0	0	0	0	1	0
0	0	0	0	1	0
0	0	0	0	1	0
0	0	0	0	1	0
0	0	0	0	1	0
0	0	0	0	1	0
0	0	0	0	1	0
0	0	0	0	1	0
0	0	0	0	1	0
0	0	0	0	1	0
0	0	0	0	1	0
0	0	0	0	1	0
0	0	0	0	1	0
0	0	0	0	1	0
0	0	0	0	1	0
0	0	0	0	1	0
0	0	0	0	1	0
0	0	0	0	1	0
0	0	0	0	1	0
0	0	0	0	1	0
0	0	0	0	1	0
0	0	0	0	1	0
0	0	0	0	1	0
0	0	0	0	1	0
0	0	0	0	1	0
0	0	0	0	1	0
0	0	0	0	1	0
0	0	0	0	1	0
0	0	0	0	1	0
0	0	0	0	1	0
0	0	0	0	1	0
0	0	0	0	1	0
0	0	0	0	1	0
0	0	0	0	1	0
0	0	0	0	1	0
0	0	0	0	1	0
0	0	0	0	1	0
0	0	0	0	1	0
0	0	0	0	1	0
0	0	0	0	1	0
0	0	0	0	1	0
0	0	0	0	1	0
0	0	0	0	1	0
0	0	0	0	1	0
0	0	0	0	1	0
0	0	0	0	1	0
0	0	0	0	1	0
0	0	0	0	1	0
0	0	0	0	1	0
0	0	0	0	1	0
0	0	0	0	1	0
0	0	0	0	1	0
0	0	0	0	1	0
0	0	0	0	1	0
0	0	0	0	1	0
0	0	0	0	1	0
0	0	0	0	1	0
0	0	0	0	1	0
0	0	0	0	1	0
0	0	0	0	1	0
0	0	0	0	1	0
0	0	0	0	1	0
0	0	0	0	1	0
0	0	0	0	1	0
0	0	0	0	1	0
0	0	0	0	1	0
0	0	0	0	1	0
0	0	0	0	1	0
0	0	0	0	1	0
0	0	0	0	1	0
0	0	0	0	1	0
0	0	0	0	1	0
0	0	0	0	1	0
0	0	0	0	1	0
0	0	0	0	1	0
0	0	0	0	1	0
0	0	0	0	1	0
0	0	0	0	1	0
0	0	0	0	1	0
0	0	0	0	1	0
0	0	0	0	1	0
0	0	0	0	1	0
0	0	0	0	1	0
0	0	0	0	1	0
0	0	0	0	1	0
0	0	0	0	1	0
0	0	0	0	1	0
0	0	0	0	1	0
0	0	0	0	1	0
0	0	0	0	1	0
0	0	0	0	1	0
0	0	0	0	1	0
0	0	0	0	1	0
0	0	0	0	1	0
0	0	0	0	1	0
0	0	0	0	1	0
0	0	0	0	1	0
0	0	0	0	1	0
0	0	0	0	1	0
0	0	0	0	1	0
0	0	0	0	1	0
0	0	0	0	1	0
0	0	0	0	1	0
0	0	0	0	1	0
0	0	0	0	1	0
0	0	0	0	1	0
0	0	0	0	1	0
0	0	0	0	1	0
0	0	0	0	1	0
0	0	0	0	1	0
0	0	0	0	1	0
0	0	0	0	1	0
0	0	0	0	1	0
0	0	0	0	1	0
0	0	0	0	1	0
0	0	0	0	1	0
0	0	0	0	1	0
0	0	0	0	1	0
0	0	0	0	1	0
0	0	0	0	1	0
0	0	0	0	1	0
0	0	0	0	1	0
0	0	0	0	1	0
0	0	0	0	1	0
0	0	0	0	1	0
0	0	0	0	1	0
0	0	0	0	1	0
0	0	0	0	1	0
0	0	0	0	1	0
0	0	0	0	1	0
0	0	0	0	1	0
0	0	0	0	1	0
0	0	0	0	1	0
0	0	0	0	1	0
0	0	0	0	1	0
0	0	0	0	1	0
0	0	0	0	1	0
0	0	0	0	1	0
0	0	0	0	1	0
0	0	0	0	1	0
0	0	0	0	1	0
0	0	0	0	1	0
0	0	0	0	1	0
0	0	0	0	1	0
0	0	0	0	1	0
0	0	0	0	1	0
0	0	0	0	1	0
0	0	0	0	1	0
0	0	0	0	1	0
0	0	0	0	1	0
0	0	0	0	1	0
0	0	0	0	1	0
0	0	0	0	1	0
0	0	0	0	1	0
0	0	0	0	1	0
0	0	0	0	1	0
0	0	0	0	1	0
0	0	0	0	1	0
0	0	0	0	1	0
0	0	0	0	1	0
0	0	0	0	1	0
0	0	0	0	1	0
0	0	0	0	1	0
0	0	0	0	1	0
0	0	0	0	1	0
0	0	0	0	1	0
0	0	0	0	1	0
0	0	0	0	1	0
0	0	0	0	1	0
0	0	0	0	1	0
0	0	0	0	1	0
0	0	0	0	1	0
0	0	0	0	1	0
0	0	0	0	1	0
0	0	0	0	1	0
0	0	0	0	1	0
0	0	0	0	1	0
0	0	0	0	1	0
0	0	0	0	1	0
0	0	0	0	1	0
0	0	0	0	1	0
0	0	0	0	1	0
0	0	0	0	1	0
0	0	0	0	1	0
0	0	0	0	1	0
0	0	0	0	1	0
0	0	0	0	1	0
0	0	0	0	1	0
0	0	0	0	1	0
0	0	0	0	1	0
0	0	0	0	1	0
0	0	0	0	1	0
0	0	0	0	1	0
0	0	0	0	1	0
0	0	0	0	1	0
0	0	0	0	1	0
0	0	0	0	1	0
0	0	0	0	1	0
0	0	0	0	1	0
0	0	0	0	1	0
0	0	0	0	1	0
0	0	0	0	1	0
0	0	0	0	1	0
0	0	0	0	1	0
0	0	0	0	1	0
0	0	0	0	1	0
0	0	0	0	1	0
0	0	0	0	1	0
0	0	0	0	1	0
0	0	0	0	1	0
0	0	0	0	1	0
0	0	0	0	1	0
0	0	0	0	1	0
0	0	0	0	1	0
0	0	0	0	1	0
0	0	0	0	1	0
0	0	0	0	1	0
0	0	0	0	1	0
0	0	0	0	1	0
0	0	0	0	1	0
0	0	0	0	1	0
0	0	0	0	1	0
0	0	0	0	1	0
0	0	0	0	1	0
0	0	0	0	1	0
0	0	0	0	1	0
0	0	0	0	1	0
0	0	0	0	1	0
0	0	0	0	1	0
0	0	0	0	1	0
0	0	0	0	1	0
0	0	0	0	1	0
0	0	0	0	1	0
0	0	0	0	1	0
0	0	0	0	1	0
0	0	0	0	1	0
0	0	0	0	1	0
0	0	0	0	1	0
0	0	0	0	1	0
0	0	0	0	1	0
0	0	0	0	1	0
0	0	0	0	1	0
0	0	0	0	1	0
0	0	0	0	1	0
0	0	0	0	1	0
0	0	0	0	1	0
0	0	0	0	1	0
0	0	0	0	1	0
0	0	0	0	1	0
0	0	0	0	1	0
0	0	0	0	1	0
0	0	0	0	1	0
0	0	0	0	1	0
0	0	0	0	1	0
0	0	0	0	1	0
0	0	0	0	1	0
0	0	0	0	1	0
0	0	0	0	1	0
0	0	0	0	1	0
0	0	0	0	1	0
0	0	0	0	1	0
0	0	0	0	1	0
0	0	0	0	1	0
0	0	0	0	1	0
0	0	0	0	1	0
0	0	0	0	1	0
0	0	0	0	1	0
0	0	0	0	1	0
0	0	0	0	1	0
0	0	0	0	1	0
0	0	0	0	1	0
0	0	0	0	1	0
0	0	0	0	1	0
0	0	0	0	1	0
0	0	0	0	1	0
0	0	0	0	1	0
0	0	0	0	1	0
0	0	0	0	1	0
0	0	0	0	1	0
0	0	0	0	1	0
0	0	0	0	1	0
0	0	0	0	1	0
0	0	0	0	1	0
0	0	0	0	1	0
0	0	0	0	1	0
0	0	0	0	1	0
0	0	0	0	1	0
0	0	0	0	1	0
0	0	0	0	1	0
0	0	0	0	1	0
0	0	0	0	1	0
0	0	0	0	1	0
0	0	0	0	1	0
0	0	0	0	1	0
0	0	0	0	1	0
0	0	0	0	1	0
0	0	0	0	1	0
0	0	0	0	1	0
0	0	0	0	1	0
0	0	0	0	1	0
0	0	0	0	1	0
0	0	0	0	1	0
0	0	0	0	1	0
0	0	0	0	1	1
0	0	0	0	1	1
0	0	0	0	1	1
0	0	0	0	1	1
0	0	0	0	1	1
0	0	0	0	1	1
0	0	0	0	1	1
0	0	0	0	1	1
0	0	0	0	1	1
0	0	0	0	1	1
0	0	0	0	1	1
0	0	0	0	1	1
0	0	0	0	1	1
0	0	0	0	1	1
0	0	0	0	1	1
0	0	0	0	1	1
0	0	0	0	1	1
0	0	0	0	1	1
0	0	0	0	1	1
0	0	0	0	1	1
0	0	0	0	1	1
0	0	0	0	1	1
0	0	0	0	1	1
0	0	0	0	1	1
0	0	0	0	1	1
0	0	0	0	1	1
0	0	0	0	1	1
0	0	0	0	1	1
0	0	0	0	1	1
0	0	0	0	1	1
0	0	0	0	1	1
0	0	0	0	1	1
0	0	0	0	1	1
0	0	0	0	1	1
0	0	0	0	1	1
0	0	0	0	1	1
0	0	0	0	1	1
0	0	0	0	1	1
0	0	0	0	1	1
0	0	0	0	1	1
0	0	0	0	1	1
0	0	0	0	1	1
0	0	0	0	1	1
0	0	0	0	1	1
0	0	0	0	1	1
0	0	0	0	1	1
0	0	0	0	1	1
0	0	0	0	1	1
0	0	0	0	1	1
0	0	0	0	1	1
0	0	0	0	1	1
0	0	0	0	1	1
0	0	0	0	1	1
0	0	0	0	1	1
0	0	0	0	1	1
0	0	0	0	1	1
0	0	0	0	1	1
0	0	0	0	1	1
0	0	0	0	1	1
0	0	0	0	1	1
0	0	0	0	1	1
0	0	0	0	1	1
0	0	0	0	1	2
0	0	0	0	1	2
0	0	0	0	1	2
0	0	0	0	1	2
0	0	0	0	1	2
0	0	0	0	1	2
0	0	0	0	1	2
0	0	0	0	1	2
0	0	0	0	1	2
0	0	0	0	1	2
0	0	0	0	1	2
0	0	0	0	1	2
0	0	0	0	1	2
0	0	0	0	1	2
0	0	0	0	1	2
0	0	0	0	1	2
0	0	0	0	1	2
0	0	0	0	1	2
0	0	0	0	1	2
0	0	0	0	1	2
0	0	0	0	1	2
0	0	0	0	1	2
0	0	0	0	1	2
0	0	0	0	1	2
0	0	0	0	1	2
0	0	0	0	1	2
0	0	0	0	1	2
0	0	0	0	1	2
0	0	0	0	1	2
0	0	0	0	1	2
0	0	0	0	1	2
0	0	0	0	2	0
0	0	0	0	2	0
0	0	0	0	2	0
0	0	0	0	2	0
0	0	0	0	2	0
0	0	0	0	2	0
0	0	0	0	2	0
0	0	0	0	2	0
0	0	0	0	2	0
0	0	0	0	2	0
0	0	0	0	2	0
0	0	0	0	2	0
0	0	0	0	2	0
0	0	0	0	2	0
0	0	0	0	2	0
0	0	0	0	2	0
0	0	0	0	2	0
0	0	0	0	2	0
0	0	0	0	2	0
0	0	0	0	2	0
0	0	0	0	2	0
0	0	0	0	2	0
0	0	0	0	2	0
0	0	0	0	2	0
0	0	0	0	2	0
0	0	0	0	2	0
0	0	0	0	2	0
0	0	0	0	2	0
0	0	0	0	2	0
0	0	0	0	2	0
0	0	0	0	2	0
0	0	0	0	2	0
0	0	0	0	2	0
0	0	0	0	2	0
0	0	0	0	2	0
0	0	0	0	2	0
0	0	0	0	2	0
0	0	0	0	2	0
0	0	0	0	2	0
0	0	0	0	2	0
0	0	0	0	2	0
0	0	0	0	2	0
0	0	0	0	2	0
0	0	0	0	2	0
0	0	0	0	2	0
0	0	0	0	2	0
0	0	0	0	2	0
0	0	0	0	2	0
0	0	0	0	2	0
0	0	0	0	2	0
0	0	0	0	2	0
0	0	0	0	2	0
0	0	0	0	2	0
0	0	0	0	2	0
0	0	0	0	2	0
0	0	0	0	2	0
0	0	0	0	2	0
0	0	0	0	2	0
0	0	0	0	2	0
0	0	0	0	2	0
0	0	0	0	2	0
0	0	0	0	2	0
0	0	0	0	2	0
0	0	0	0	2	0
0	0	0	0	2	0
0	0	0	0	2	0
0	0	0	0	2	0
0	0	0	0	2	0
0	0	0	0	2	0
0	0	0	0	2	0
0	0	0	0	2	0
0	0	0	0	2	0
0	0	0	0	2	0
0	0	0	0	2	0
0	0	0	0	2	0
0	0	0	0	2	0
0	0	0	0	2	0
0	0	0	0	2	0
0	0	0	0	2	0
0	0	0	0	2	0
0	0	0	0	2	0
0	0	0	0	2	0
0	0	0	0	2	0
0	0	0	0	2	0
0	0	0	0	2	0
0	0	0	0	2	0
0	0	0	0	2	0
0	0	0	0	2	0
0	0	0	0	2	0
0	0	0	0	2	0
0	0	0	0	2	0
0	0	0	0	2	0
0	0	0	0	2	0
0	0	0	0	2	0
0	0	0	0	2	0
0	0	0	0	2	0
0	0	0	0	2	0
0	0	0	0	2	0
0	0	0	0	2	0
0	0	0	0	2	0
0	0	0	0	2	0
0	0	0	0	2	0
0	0	0	0	2	0
0	0	0	0	2	0
0	0	0	0	2	0
0	0	0	0	2	0
0	0	0	0	2	0
0	0	0	0	2	0
0	0	0	0	2	0
0	0	0	0	2	0
0	0	0	0	2	0
0	0	0	0	2	0
0	0	0	0	2	0
0	0	0	0	2	0
0	0	0	0	2	0
0	0	0	0	2	0
0	0	0	0	2	0
0	0	0	0	2	0
0	0	0	0	2	0
0	0	0	0	2	0
0	0	0	0	2	0
0	0	0	0	2	0
0	0	0	0	2	0
0	0	0	0	2	0
0	0	0	0	2	0
0	0	0	0	2	0
0	0	0	0	2	0
0	0	0	0	2	0
0	0	0	0	2	0
0	0	0	0	2	0
0	0	0	0	2	0
0	0	0	0	2	0
0	0	0	0	2	0
0	0	0	0	2	0
0	0	0	0	2	0
0	0	0	0	2	0
0	0	0	0	2	0
0	0	0	0	2	0
0	0	0	0	2	0
0	0	0	0	2	0
0	0	0	0	2	0
0	0	0	0	2	0
0	0	0	0	2	0
0	0	0	0	2	0
0	0	0	0	2	0
0	0	0	0	2	0
0	0	0	0	2	0
0	0	0	0	2	0
0	0	0	0	2	0
0	0	0	0	2	0
0	0	0	0	2	0
0	0	0	0	2	0
0	0	0	0	2	0
0	0	0	0	2	0
0	0	0	0	2	0
0	0	0	0	2	0
0	0	0	0	2	0
0	0	0	0	2	0
0	0	0	0	2	0
0	0	0	0	2	0
0	0	0	0	2	0
0	0	0	0	2	0
0	0	0	0	2	0
0	0	0	0	2	0
0	0	0	0	2	0
0	0	0	0	2	0
0	0	0	0	2	0
0	0	0	0	2	0
0	0	0	0	2	0
0	0	0	0	2	0
0	0	0	0	2	0
0	0	0	0	2	0
0	0	0	0	2	0
0	0	0	0	2	0
0	0	0	0	2	0
0	0	0	0	2	0
0	0	0	0	2	0
0	0	0	0	2	0
0	0	0	0	2	0
0	0	0	0	2	0
0	0	0	0	2	0
0	0	0	0	2	0
0	0	0	0	2	0
0	0	0	0	2	0
0	0	0	0	2	0
0	0	0	0	2	0
0	0	0	0	2	0
0	0	0	0	2	0
0	0	0	0	2	0
0	0	0	0	2	0
0	0	0	0	2	0
0	0	0	0	2	0
0	0	0	0	2	0
0	0	0	0	2	0
0	0	0	0	2	0
0	0	0	0	2	0
0	0	0	0	2	0
0	0	0	0	2	0
0	0	0	0	2	0
0	0	0	0	2	0
0	0	0	0	2	0
0	0	0	0	2	0
0	0	0	0	2	0
0	0	0	0	2	0
0	0	0	0	2	0
0	0	0	0	2	0
0	0	0	0	2	0
0	0	0	0	2	0
0	0	0	0	2	0
0	0	0	0	2	0
0	0	0	0	2	0
0	0	0	0	2	0
0	0	0	0	2	0
0	0	0	0	2	0
0	0	0	0	2	0
0	0	0	0	2	0
0	0	0	0	2	0
0	0	0	0	2	0
0	0	0	0	2	0
0	0	0	0	2	0
0	0	0	0	2	0
0	0	0	0	2	0
0	0	0	0	2	0
0	0	0	0	2	0
0	0	0	0	2	0
0	0	0	0	2	0
0	0	0	0	2	0
0	0	0	0	2	0
0	0	0	0	2	0
0	0	0	0	2	0
0	0	0	0	2	0
0	0	0	0	2	0
0	0	0	0	2	0
0	0	0	0	2	0
0	0	0	0	2	0
0	0	0	0	2	0
0	0	0	0	2	0
0	0	0	0	2	0
0	0	0	0	2	0
0	0	0	0	2	0
0	0	0	0	2	0
0	0	0	0	2	0
0	0	0	0	2	0
0	0	0	0	2	0
0	0	0	0	2	0
0	0	0	0	2	0
0	0	0	0	2	0
0	0	0	0	2	0
0	0	0	0	2	0
0	0	0	0	2	0
0	0	0	0	2	0
0	0	0	0	2	0
0	0	0	0	2	0
0	0	0	0	2	0
0	0	0	0	2	0
0	0	0	0	2	0
0	0	0	0	2	0
0	0	0	0	2	0
0	0	0	0	2	0
0	0	0	0	2	0
0	0	0	0	2	0
0	0	0	0	2	0
0	0	0	0	2	0
0	0	0	0	2	0
0	0	0	0	2	0
0	0	0	0	2	0
0	0	0	0	2	0
0	0	0	0	2	0
0	0	0	0	2	0
0	0	0	0	2	0
0	0	0	0	2	0
0	0	0	0	2	0
0	0	0	0	2	0
0	0	0	0	2	0
0	0	0	0	2	0
0	0	0	0	2	0
0	0	0	0	2	0
0	0	0	0	2	0
0	0	0	0	2	0
0	0	0	0	2	0
0	0	0	0	2	0
0	0	0	0	2	0
0	0	0	0	2	0
0	0	0	0	2	0
0	0	0	0	2	0
0	0	0	0	2	0
0	0	0	0	2	0
0	0	0	0	2	0
0	0	0	0	2	0
0	0	0	0	2	0
0	0	0	0	2	0
0	0	0	0	2	0
0	0	0	0	2	0
0	0	0	0	2	0
0	0	0	0	2	0
0	0	0	0	2	0
0	0	0	0	2	0
0	0	0	0	2	0
0	0	0	0	2	0
0	0	0	0	2	0
0	0	0	0	2	0
0	0	0	0	2	0
0	0	0	0	2	0
0	0	0	0	2	0
0	0	0	0	2	0
0	0	0	0	2	0
0	0	0	0	2	0
0	0	0	0	2	0
0	0	0	0	2	0
0	0	0	0	2	0
0	0	0	0	2	0
0	0	0	0	2	0
0	0	0	0	2	0
0	0	0	0	2	0
0	0	0	0	2	0
0	0	0	0	2	0
0	0	0	0	2	0
0	0	0	0	2	0
0	0	0	0	2	0
0	0	0	0	2	0
0	0	0	0	2	0
0	0	0	0	2	0
0	0	0	0	2	0
0	0	0	0	2	0
0	0	0	0	2	0
0	0	0	0	2	0
0	0	0	0	2	0
0	0	0	0	2	0
0	0	0	0	2	0
0	0	0	0	2	0
0	0	0	0	2	0
0	0	0	0	2	0
0	0	0	0	2	0
0	0	0	0	2	0
0	0	0	0	2	0
0	0	0	0	2	0
0	0	0	0	2	0
0	0	0	0	2	0
0	0	0	0	2	0
0	0	0	0	2	0
0	0	0	0	2	0
0	0	0	0	2	0
0	0	0	0	2	0
0	0	0	0	2	0
0	0	0	0	2	0
0	0	0	0	2	0
0	0	0	0	2	0
0	0	0	0	2	0
0	0	0	0	2	0
0	0	0	0	2	0
0	0	0	0	2	0
0	0	0	0	2	0
0	0	0	0	2	0
0	0	0	0	2	0
0	0	0	0	2	0
0	0	0	0	2	0
0	0	0	0	2	0
0	0	0	0	2	0
0	0	0	0	2	0
0	0	0	0	2	0
0	0	0	0	2	0
0	0	0	0	2	0
0	0	0	0	2	0
0	0	0	0	2	0
0	0	0	0	2	0
0	0	0	0	2	0
0	0	0	0	2	0
0	0	0	0	2	0
0	0	0	0	2	0
0	0	0	0	2	0
0	0	0	0	2	0
0	0	0	0	2	0
0	0	0	0	2	0
0	0	0	0	2	0
0	0	0	0	2	0
0	0	0	0	2	0
0	0	0	0	2	0
0	0	0	0	2	0
0	0	0	0	2	0
0	0	0	0	2	0
0	0	0	0	2	0
0	0	0	0	2	0
0	0	0	0	2	0
0	0	0	0	2	0
0	0	0	0	2	0
0	0	0	0	2	0
0	0	0	0	2	0
0	0	0	0	2	0
0	0	0	0	2	0
0	0	0	0	2	0
0	0	0	0	2	0
0	0	0	0	2	0
0	0	0	0	2	0
0	0	0	0	2	0
0	0	0	0	2	0
0	0	0	0	2	0
0	0	0	0	2	0
0	0	0	0	2	0
0	0	0	0	2	0
0	0	0	0	2	0
0	0	0	0	2	0
0	0	0	0	2	0
0	0	0	0	2	0
0	0	0	0	2	0
0	0	0	0	2	0
0	0	0	0	2	0
0	0	0	0	2	0
0	0	0	0	2	0
0	0	0	0	2	0
0	0	0	0	2	0
0	0	0	0	2	0
0	0	0	0	2	0
0	0	0	0	2	0
0	0	0	0	2	0
0	0	0	0	2	0
0	0	0	0	2	0
0	0	0	0	2	0
0	0	0	0	2	0
0	0	0	0	2	0
0	0	0	0	2	0
0	0	0	0	2	0
0	0	0	0	2	0
0	0	0	0	2	0
0	0	0	0	2	0
0	0	0	0	2	0
0	0	0	0	2	0
0	0	0	0	2	0
0	0	0	0	2	0
0	0	0	0	2	0
0	0	0	0	2	0
0	0	0	0	2	0
0	0	0	0	2	0
0	0	0	0	2	0
0	0	0	0	2	0
0	0	0	0	2	0
0	0	0	0	2	0
0	0	0	0	2	0
0	0	0	0	2	0
0	0	0	0	2	0
0	0	0	0	2	0
0	0	0	0	2	0
0	0	0	0	2	0
0	0	0	0	2	0
0	0	0	0	2	0
0	0	0	0	2	0
0	0	0	0	2	0
0	0	0	0	2	0
0	0	0	0	2	0
0	0	0	0	2	0
0	0	0	0	2	0
0	0	0	0	2	0
0	0	0	0	2	0
0	0	0	0	2	0
0	0	0	0	2	0
0	0	0	0	2	0
0	0	0	0	2	0
0	0	0	0	2	0
0	0	0	0	2	0
0	0	0	0	2	0
0	0	0	0	2	0
0	0	0	0	2	0
0	0	0	0	2	0
0	0	0	0	2	0
0	0	0	0	2	0
0	0	0	0	2	0
0	0	0	0	2	0
0	0	0	0	2	0
0	0	0	0	2	0
0	0	0	0	2	0
0	0	0	0	2	0
0	0	0	0	2	0
0	0	0	0	2	0
0	0	0	0	2	0
0	0	0	0	2	0
0	0	0	0	2	0
0	0	0	0	2	0
0	0	0	0	2	0
0	0	0	0	2	0
0	0	0	0	2	0
0	0	0	0	2	0
0	0	0	0	2	0
0	0	0	0	2	0
0	0	0	0	2	0
0	0	0	0	2	0
0	0	0	0	2	0
0	0	0	0	2	0
0	0	0	0	2	0
0	0	0	0	2	0
0	0	0	0	2	0
0	0	0	0	2	0
0	0	0	0	2	0
0	0	0	0	2	0
0	0	0	0	2	0
0	0	0	0	2	0
0	0	0	0	2	0
0	0	0	0	2	0
0	0	0	0	2	0
0	0	0	0	2	0
0	0	0	0	2	0
0	0	0	0	2	0
0	0	0	0	2	0
0	0	0	0	2	0
0	0	0	0	2	0
0	0	0	0	2	0
0	0	0	0	2	0
0	0	0	0	2	0
0	0	0	0	2	0
0	0	0	0	2	0
0	0	0	0	2	0
0	0	0	0	2	0
0	0	0	0	2	0
0	0	0	0	2	0
0	0	0	0	2	0
0	0	0	0	2	0
0	0	0	0	2	0
0	0	0	0	2	0
0	0	0	0	2	0
0	0	0	0	2	0
0	0	0	0	2	0
0	0	0	0	2	0
0	0	0	0	2	0
0	0	0	0	2	0
0	0	0	0	2	0
0	0	0	0	2	0
0	0	0	0	2	0
0	0	0	0	2	0
0	0	0	0	2	0
0	0	0	0	2	0
0	0	0	0	2	0
0	0	0	0	2	0
0	0	0	0	2	0
0	0	0	0	2	0
0	0	0	0	2	0
0	0	0	0	2	0
0	0	0	0	2	0
0	0	0	0	2	0
0	0	0	0	2	0
0	0	0	0	2	0
0	0	0	0	2	0
0	0	0	0	2	0
0	0	0	0	2	0
0	0	0	0	2	0
0	0	0	0	2	0
0	0	0	0	2	0
0	0	0	0	2	0
0	0	0	0	2	0
0	0	0	0	2	0
0	0	0	0	2	0
0	0	0	0	2	0
0	0	0	0	2	0
0	0	0	0	2	0
0	0	0	0	2	0
0	0	0	0	2	0
0	0	0	0	2	0
0	0	0	0	2	0
0	0	0	0	2	0
0	0	0	0	2	0
0	0	0	0	2	0
0	0	0	0	2	0
0	0	0	0	2	0
0	0	0	0	2	0
0	0	0	0	2	0
0	0	0	0	2	0
0	0	0	0	2	0
0	0	0	0	2	0
0	0	0	0	2	0
0	0	0	0	2	0
0	0	0	0	2	0
0	0	0	0	2	0
0	0	0	0	2	0
0	0	0	0	2	0
0	0	0	0	2	0
0	0	0	0	2	0
0	0	0	0	2	0
0	0	0	0	2	0
0	0	0	0	2	0
0	0	0	0	2	0
0	0	0	0	2	0
0	0	0	0	2	0
0	0	0	0	2	0
0	0	0	0	2	0
0	0	0	0	2	0
0	0	0	0	2	0
0	0	0	0	2	0
0	0	0	0	2	0
0	0	0	0	2	0
0	0	0	0	2	0
0	0	0	0	2	0
0	0	0	0	2	0
0	0	0	0	2	0
0	0	0	0	2	0
0	0	0	0	2	0
0	0	0	0	2	0
0	0	0	0	2	0
0	0	0	0	2	0
0	0	0	0	2	0
0	0	0	0	2	0
0	0	0	0	2	0
0	0	0	0	2	0
0	0	0	0	2	0
0	0	0	0	2	0
0	0	0	0	2	0
0	0	0	0	2	0
0	0	0	0	2	0
0	0	0	0	2	0
0	0	0	0	2	0
0	0	0	0	2	0
0	0	0	0	2	0
0	0	0	0	2	0
0	0	0	0	2	0
0	0	0	0	2	0
0	0	0	0	2	0
0	0	0	0	2	0
0	0	0	0	2	0
0	0	0	0	2	0
0	0	0	0	2	0
0	0	0	0	2	0
0	0	0	0	2	0
0	0	0	0	2	0
0	0	0	0	2	0
0	0	0	0	2	0
0	0	0	0	2	0
0	0	0	0	2	0
0	0	0	0	2	0
0	0	0	0	2	0
0	0	0	0	2	0
0	0	0	0	2	0
0	0	0	0	2	0
0	0	0	0	2	0
0	0	0	0	2	0
0	0	0	0	2	0
0	0	0	0	2	0
0	0	0	0	2	0
0	0	0	0	2	0
0	0	0	0	2	0
0	0	0	0	2	0
0	0	0	0	2	0
0	0	0	0	2	0
0	0	0	0	2	0
0	0	0	0	2	0
0	0	0	0	2	0
0	0	0	0	2	0
0	0	0	0	2	0
0	0	0	0	2	0
0	0	0	0	2	0
0	0	0	0	2	0
0	0	0	0	2	0
0	0	0	0	2	0
0	0	0	0	2	0
0	0	0	0	2	0
0	0	0	0	2	0
0	0	0	0	2	0
0	0	0	0	2	0
0	0	0	0	2	0
0	0	0	0	2	0
0	0	0	0	2	0
0	0	0	0	2	0
0	0	0	0	2	0
0	0	0	0	2	0
0	0	0	0	2	0
0	0	0	0	2	0
0	0	0	0	2	0
0	0	0	0	2	0
0	0	0	0	2	0
0	0	0	0	2	0
0	0	0	0	2	0
0	0	0	0	2	0
0	0	0	0	2	0
0	0	0	0	2	0
0	0	0	0	2	0
0	0	0	0	2	0
0	0	0	0	2	0
0	0	0	0	2	0
0	0	0	0	2	0
0	0	0	0	2	0
0	0	0	0	2	0
0	0	0	0	2	0
0	0	0	0	2	0
0	0	0	0	2	0
0	0	0	0	2	0
0	0	0	0	2	0
0	0	0	0	2	0
0	0	0	0	2	0
0	0	0	0	2	0
0	0	0	0	2	0
0	0	0	0	2	0
0	0	0	0	2	0
0	0	0	0	2	0
0	0	0	0	2	0
0	0	0	0	2	0
0	0	0	0	2	0
0	0	0	0	2	0
0	0	0	0	2	0
0	0	0	0	2	0
0	0	0	0	2	0
0	0	0	0	2	0
0	0	0	0	2	0
0	0	0	0	2	0
0	0	0	0	2	0
0	0	0	0	2	0
0	0	0	0	2	0
0	0	0	0	2	0
0	0	0	0	2	0
0	0	0	0	2	0
0	0	0	0	2	0
0	0	0	0	2	0
0	0	0	0	2	0
0	0	0	0	2	0
0	0	0	0	2	0
0	0	0	0	2	0
0	0	0	0	2	0
0	0	0	0	2	0
0	0	0	0	2	0
0	0	0	0	2	0
0	0	0	0	2	0
0	0	0	0	2	0
0	0	0	0	2	0
0	0	0	0	2	0
0	0	0	0	2	0
0	0	0	0	2	0
0	0	0	0	2	0
0	0	0	0	2	0
0	0	0	0	2	0
0	0	0	0	2	0
0	0	0	0	2	0
0	0	0	0	2	0
0	0	0	0	2	0
0	0	0	0	2	0
0	0	0	0	2	0
0	0	0	0	2	0
0	0	0	0	2	0
0	0	0	0	2	0
0	0	0	0	2	0
0	0	0	0	2	0
0	0	0	0	2	0
0	0	0	0	2	0
0	0	0	0	2	0
0	0	0	0	2	0
0	0	0	0	2	0
0	0	0	0	2	0
0	0	0	0	2	0
0	0	0	0	2	0
0	0	0	0	2	0
0	0	0	0	2	0
0	0	0	0	2	0
0	0	0	0	2	0
0	0	0	0	2	0
0	0	0	0	2	0
0	0	0	0	2	1
0	0	0	0	2	1
0	0	0	0	2	1
0	0	0	0	2	1
0	0	0	0	2	1
0	0	0	0	2	1
0	0	0	0	2	1
0	0	0	0	2	1
0	0	0	0	2	1
0	0	0	0	2	1
0	0	0	0	2	1
0	0	0	0	2	1
0	0	0	0	2	1
0	0	0	0	2	1
0	0	0	0	2	1
0	0	0	0	2	1
0	0	0	0	2	1
0	0	0	0	2	1
0	0	0	0	2	1
0	0	0	0	2	1
0	0	0	0	2	1
0	0	0	0	2	1
0	0	0	0	2	1
0	0	0	0	2	1
0	0	0	0	2	1
0	0	0	0	2	1
0	0	0	0	2	1
0	0	0	0	2	1
0	0	0	0	2	1
0	0	0	0	2	1
0	0	0	0	2	1
0	0	0	0	2	1
0	0	0	0	2	1
0	0	0	0	2	1
0	0	0	0	2	1
0	0	0	0	2	1
0	0	0	0	2	1
0	0	0	0	2	1
0	0	0	0	2	1
0	0	0	0	2	1
0	0	0	0	2	1
0	0	0	0	2	1
0	0	0	0	2	1
0	0	0	0	2	1
0	0	0	0	2	1
0	0	0	0	2	1
0	0	0	0	2	1
0	0	0	0	2	1
0	0	0	0	2	1
0	0	0	0	2	1
0	0	0	0	2	1
0	0	0	0	2	1
0	0	0	0	2	1
0	0	0	0	2	1
0	0	0	0	2	1
0	0	0	0	2	1
0	0	0	0	2	2
0	0	0	0	2	2
0	0	0	0	2	2
0	0	0	0	2	2
[truncated: 19,436 more rows]
